# Supplementary material for: Atypical prediction error learning is associated with prodromal symptoms in individuals at clinical high risk for psychosis
Source: Springer Nature journal article supplement (doi:10.1038/s41537-022-00302-3), 2022-11-25
Supplement: MOESM1 [file 41537_2022_302_MOESM1_ESM.pdf]

## Supplementary

### *Computational model parameters*

Three participant-specific perceptual parameters,  $\kappa$ ,  $\omega_2$  and  $\omega_3$  modulate individual learning and belief trajectories. Parameter  $\kappa$  determines the coupling strength between the second and the third level, while  $\omega_2$  is the tonic component of the log-volatility at the second level, which determines the speed of learning about stimulus transition contingencies. Parameter  $\omega_3$  refers to the variability of volatility over time (meta-volatility) and determines the speed of learning about environmental volatility.

In our context, however, the auditory oddball task is a passive paradigm simulated participants' belief trajectories using Bayes-optimal parameters, which resulted in slightly different parameter values for each participant because, although the probability schedule was consistent across participants, the exact order of the tones differed across participants. The priors over the parameters are summarized in **Table S4** and **Table S5** provides a summary of the HGF parameters from the optimal Bayesian model inversion.

### *Expression of informational uncertainty in the control and clinically high risk group*

In both the HC and CHR group, there were significant trial-wise correlations between informational uncertainty ( $\sigma_2$ ) and EEG amplitudes. In the HC group, a significant cluster occurred between 100 and 146 ms post-stimulus, peaking at 100 ms (peak,  $F_{(1,22)} = 33.40$ ;  $p = 0.0100$ ; **Figure S2A**) and 136 ms (peak,  $F_{(1,22)} = 34.21$ ;  $p = 0.0088$ ; **Figure S2A**) in frontal central channels. In the CHR group, a significant cluster occurred between 100 and 168 ms post-stimulus, peaking

at 100 ms (peak,  $F_{(1,30)} = 22.47$ ;  $p = 0.0358$ ; **Figure S2C**) in frontocentral channels and 122 ms (peak,  $F_{(1,30)} = 39.72$ ;  $p = 9.3\text{e-}4$ ; **Figure S2C**) in frontal channels.

## Supplementary Figures and Tables

### A. Tone

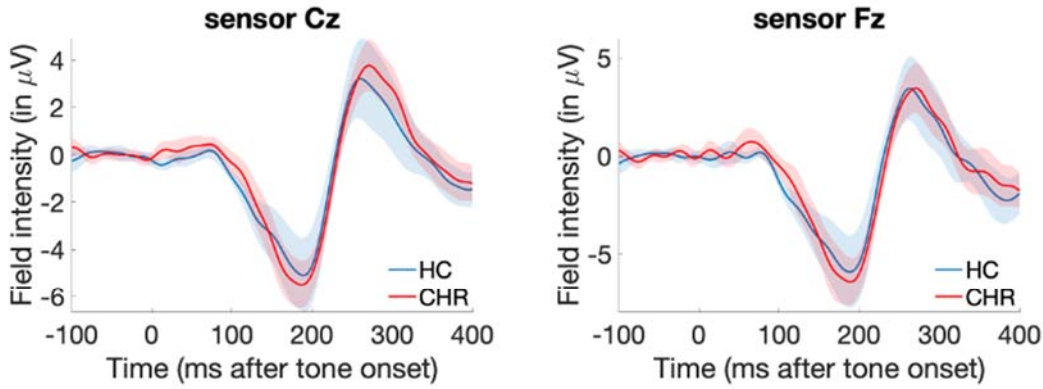

### B. $\varepsilon_2$ (Lower-level pwPE)

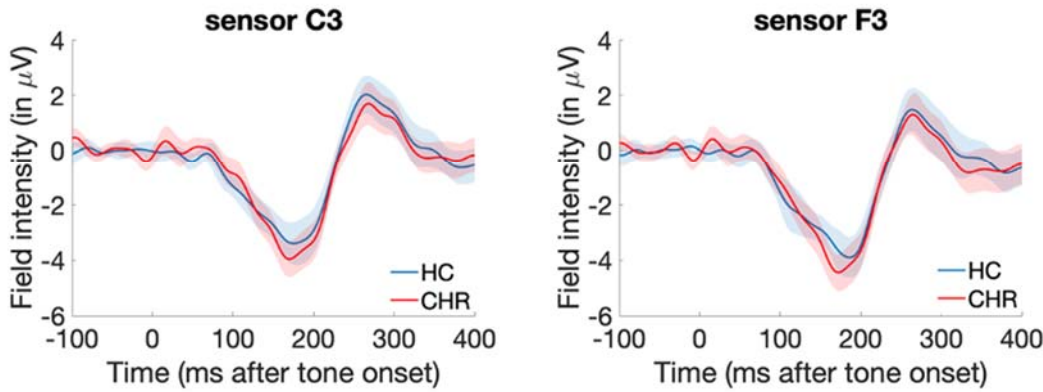

### C. $\varepsilon_3$ (Higher-level pwPE)

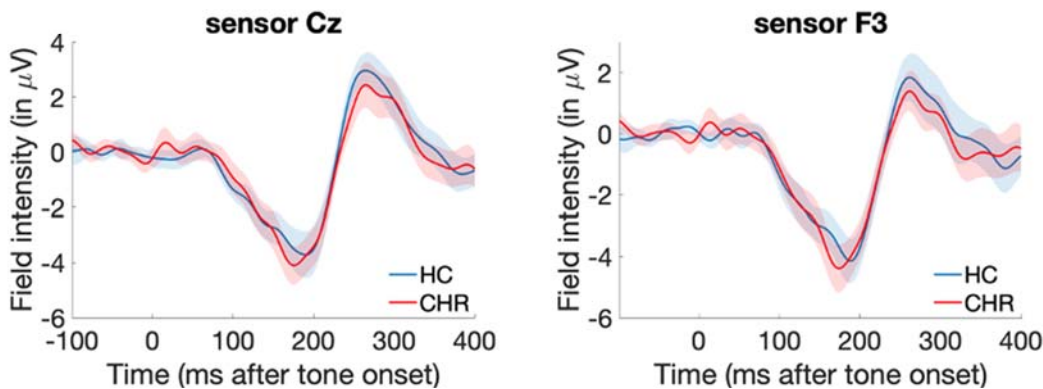

**Figure S1: Average event-related potentials.** Average mismatch negativity waveform (standard - deviant tones) (A) and difference waveform (15% highest - 15% lowest  $\varepsilon_2$  and  $\varepsilon_3$  trials, respectively) (B, C) at electrodes within significant clusters close to the peak effect in the healthy control (HC) group and clinically high risk (CHR) groups.

### Effect of $\sigma_2$ in Control Group

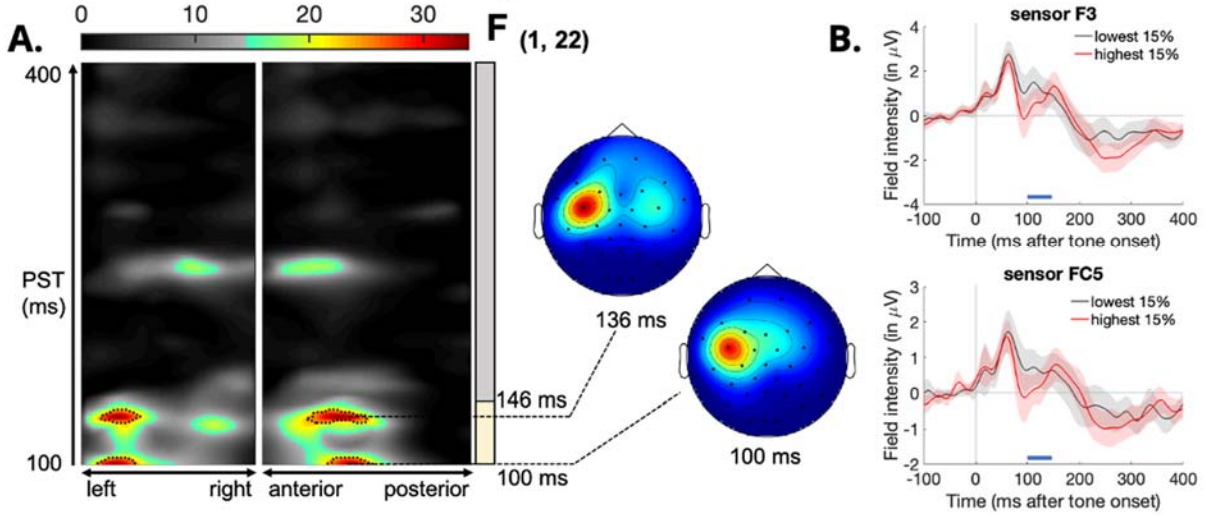

### Effect of $\sigma_2$ in CHR Group

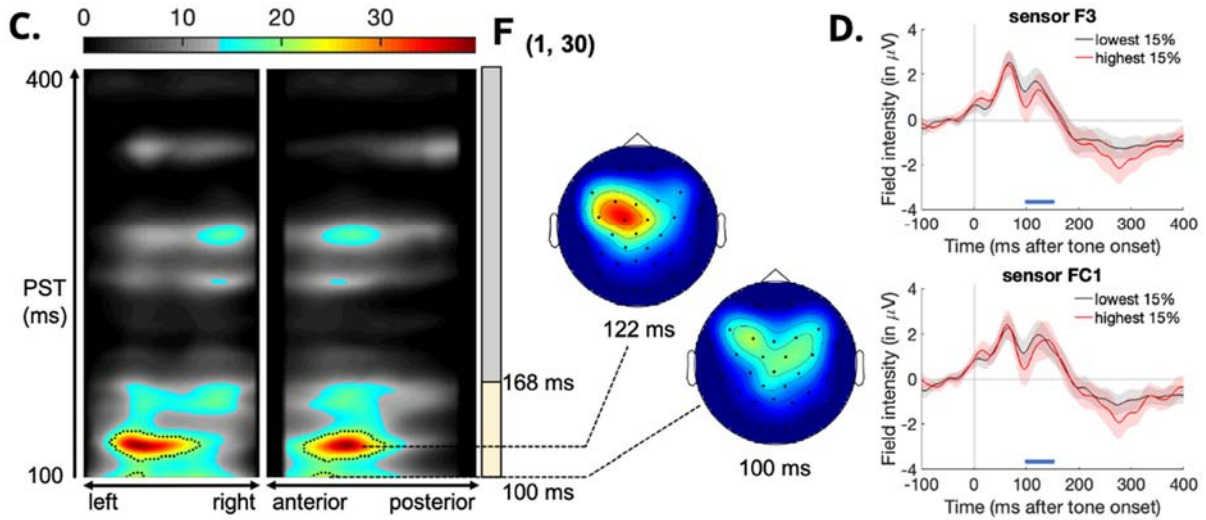

**Figure S2: Expression of informational uncertainty in control and clinically high risk groups.**

(A) Maximum intensity projections of the significant clusters over left to right and anterior to posterior scalp locations (left) of the  $F$ -statistic for the informational uncertainty ( $\sigma_2$ ).

Significant effects ( $p < 0.05$ , whole-volume family wise error (FWE) corrected at the cluster level with a cluster-defining threshold of  $p < 0.001$ ) are shown using a jet colour-map and significant peak level  $F$  effects ( $p < 0.05$ , whole-volume FWE corrected at the peak level) are marked by black contours. Coloured area highlights  $f$ -values that exceed the cluster-defining threshold of  $p < 0.001$ , uncorrected. Time windows of significant cluster-level correlations (earliest to latest significant timepoints) are indicated by yellow bars on the right of the  $F$  map.

*The scalp maps (right) show the peak effect of the given cluster at the indicated peristimulus time, across a 2D representation of the sensor layout. Note that the global peak effect is not always expressed at a channel location. In the control group, significant effects of informational uncertainty  $\sigma_2$  peaked at 100 ms and 136ms in frontocentral channel (sensors FC5 and F3). (B) Event related potential waveforms averaged across the 15% highest and the 15% lowest uncertainty values at electrodes within significant clusters. (C, D) In the CHR group, significant effects of informational uncertainty  $\sigma_2$  peaked at 100 ms and 122 ms in frontocentral channels (sensors FC1 and F3).*

**Table S1:** Trial statistics.

|                           | Healthy Controls<br>(n = 23) | Clinically High Risk<br>(n = 31) | Group Differences |
|---------------------------|------------------------------|----------------------------------|-------------------|
| Eye-blink trials rejected | 320 (103)                    | 369 (111)                        | $p=0.1064$        |
| Artefact trials rejected  | 93 (97)                      | 102 (95)                         | $p=0.7322$        |

*Mean and, in parenthesis, the standard deviation of the number of excluded and remaining trials per group.*

**Table S2:** Test statistics for general linear model parameters in control group.

| Computational parameter | Cluster size (voxels) | Cluster $p$ -value (FWE-corrected) | Peak $p$ -value (FWE-corrected) | F-value of peak voxel | Cohen's $f^2$ | Peak location (mm, mm, ms) |
|-------------------------|-----------------------|------------------------------------|---------------------------------|-----------------------|---------------|----------------------------|
| $\varepsilon_2$         | 34798                 | <b>8.40E-10</b>                    | <b>6.07E-07</b>                 | 133.10                | 2.794         | -42, -14, 106              |
|                         | 3471                  | <b>0.0054</b>                      | <b>0.0207</b>                   | 28.68                 | 0.471         | 8, -25, 284                |
|                         | 2472                  | <b>0.0129</b>                      | <b>0.0458</b>                   | 24.35                 | 0.381         | 0, 40, 378                 |
| $\varepsilon_3$         | 36962                 | <b>1.41E-08</b>                    | <b>7.08E-09</b>                 | 218.47                | 4.727         | -21, 18, 160               |
|                         | 16272                 | <b>1.75E-05</b>                    | <b>5.24E-06</b>                 | 97.80                 | 1.998         | 0, -9, 256                 |
|                         | 712                   | 0.088                              | 0.090                           | 19.62                 | 0.286         | -4, 34, 386                |
| $\delta_1$              | 36958                 | <b>1.31E-08</b>                    | <b>4.64E-09</b>                 | 229.47                | 4.977         | -21, 18, 162               |
|                         | 16600                 | <b>1.47E-05</b>                    | <b>1.10E-05</b>                 | 88.81                 | 1.796         | 0, -14, 256                |
|                         | 2500                  | <b>0.018</b>                       | <b>0.038</b>                    | 24.00                 | 0.374         | 0, 34, 388                 |
|                         | 4                     | 0.258                              | 0.255                           | 14.59                 | 0.189         | 47, -41, 330               |
| $\delta_2$              | 33025                 | <b>3.83E-08</b>                    | <b>2.72E-06</b>                 | 106.79                | 2.200         | -13, 72, 166               |
|                         | 6047                  | <b>0.0019</b>                      | <b>0.0042</b>                   | 36.76                 | 0.643         | -4, 2, 266                 |
|                         | 3720                  | <b>0.0077</b>                      | <b>0.0293</b>                   | 25.49                 | 0.405         | -8, 18, 390                |
| $\sigma_1$              | 124                   | 0.236                              | 0.239                           | 16.47                 | 0.224         | -34, 13, 108               |
| $\sigma_2$              | 1529                  | <b>0.0312</b>                      | <b>0.0088</b>                   | 34.21                 | 0.588         | -34, 13, 136               |
|                         |                       |                                    | <b>0.0100</b>                   | 33.40                 | 0.571         | -38, 2, 100                |
|                         | 288                   | 0.168                              | 0.118                           | 19.91                 | 0.291         | 38, 8, 130                 |
|                         | 178                   | 0.207                              | 0.154                           | 18.57                 | 0.265         | 21, 34, 248                |
| Tone                    | 36716                 | <b>1.31E-8</b>                     | <b>5.68E-9</b>                  | 224.34                | 4.860         | -21, 18, 162               |
|                         | 16641                 | <b>1.39E-5</b>                     | <b>1.30E-5</b>                  | 86.94                 | 1.754         | 0, -9, 258                 |
|                         | 3197                  | <b>0.011</b>                       | <b>0.025</b>                    | 26.15                 | 0.418         | -4, 34, 388                |
|                         | 7                     | 0.255                              | 0.243                           | 14.85                 | 0.194         | 47, -41, 330               |

*Significant values ( $p < 0.05$ ) are shown in bold.*

**Table S3:** Test statistics for general linear model parameters in clinically high risk group.

| Computational parameter | Cluster size (voxels) | Cluster $p$ -value (FWE-corrected) | Peak $p$ -value (FWE-corrected) | F-value of peak voxel | Cohen's $f^2$ | Peak location (mm, mm, ms) |
|-------------------------|-----------------------|------------------------------------|---------------------------------|-----------------------|---------------|----------------------------|
| $\varepsilon_2$         | 34978                 | <b>1.28E-10</b>                    | <b>2.43E-12</b>                 | 275.84                | 4.360         | -17, 24, 186               |
|                         | 520                   | 0.100                              | 0.140                           | 16.80                 | 0.148         | 0, -14, 264                |
| $\varepsilon_3$         | 33506                 | <b>2.08E-09</b>                    | <b>4.43E-12</b>                 | 258.81                | 4.077         | 13, -19, 180               |
|                         | 12369                 | <b>2.00E-05</b>                    | <b>4.86E-05</b>                 | 56.07                 | 0.737         | 4, -9, 262                 |
|                         | 1342                  | <b>0.0359</b>                      | <b>0.021</b>                    | 23.93                 | 0.245         | 8, 18, 400                 |
|                         | 8                     | 0.267                              | 0.241                           | 13.97                 | 0.112         | -26, 56, 326               |
| $\delta_1$              | 34256                 | <b>3.90E-09</b>                    | <b>6.12E-12</b>                 | 250.47                | 3.939         | 17, -14, 180               |
|                         | 11489                 | <b>4.80E-05</b>                    | <b>6.94E-05</b>                 | 53.35                 | 0.694         | 0, -14, 260                |
|                         | 869                   | <b>0.0632</b>                      | <b>0.0273</b>                   | 22.59                 | 0.226         | 4, 24, 400                 |
|                         | 23                    | 0.239                              | 0.163                           | 15.35                 | 0.129         | -26, 56, 326               |
| $\delta_2$              | 30335                 | <b>1.37E-08</b>                    | <b>5.05E-11</b>                 | 210.26                | 3.271         | 30, -9, 180                |
|                         | 5056                  | <b>0.0019</b>                      | <b>0.0068</b>                   | 28.82                 | 0.316         | -4, -9, 258                |
|                         | 137                   | 0.186                              | 0.069                           | 18.94                 | 0.176         | 0, 40, 400                 |
|                         | 26                    | 0.245                              | 0.134                           | 16.28                 | 0.141         | -30, 56, 330               |
| $\sigma_1$              | 284                   | 0.157                              | 0.144                           | 17.51                 | 0.157         | 0, 2, 120                  |
| $\sigma_2$              | 5993                  | <b>4.57E-04</b>                    | <b>9.30E-04</b>                 | 39.72                 | 0.481         | -21, 8, 122                |
|                         |                       |                                    | <b>0.0358</b>                   | 22.47                 | 0.225         | -26, 24, 100               |
|                         | 389                   | 0.125                              | 0.080                           | 19.14                 | 0.179         | 42, 2, 278                 |
|                         | 39                    | 0.271                              | 0.241                           | 14.64                 | 0.121         | 38, 13, 242                |
|                         | 10                    | 0.305                              | 0.311                           | 13.54                 | 0.107         | -8, 18, 276                |
| Tone                    | 33976                 | <b>4.15E-9</b>                     | <b>6.36E-12</b>                 | 249.75                | 3.927         | 21, 14, 180                |
|                         | 11353                 | <b>5.06E-5</b>                     | <b>8.80E-5</b>                  | 51.89                 | 0.671         | 4, -14, 260                |
|                         | 909                   | 0.060                              | <b>0.023</b>                    | 23.43                 | 4.360         | 4, 24, 400                 |
|                         | 19                    | 0.244                              | 0.172                           | 15.15                 | 0.148         | -26, 56, 326               |

Significant values ( $p < 0.05$ ) are shown in bold.

**Table S4:** Hierarchical Gaussian filter perceptual model parameters.

| Parameter        | Prior     |          |
|------------------|-----------|----------|
|                  | Mean      | Variance |
| $\kappa$         | $\log(1)$ | 0        |
| $\omega_2$       | -3        | 4        |
| $\omega_3$       | 2         | 4        |
| $\mu_2^{k=0}$    | 0         | 0.1      |
| $\sigma_2^{k=0}$ | 0         | 0        |
| $\mu_3^{k=0}$    | 1         | 1        |
| $\sigma_3^{k=0}$ | 0         | 0        |

Summary of the prior mean and variance of the hierarchical Gaussian filter perceptual model parameters.

**Table S5:** Hierarchical Gaussian filter model inversion parameters.

|                  | Healthy Controls<br>(n = 23) | CHR Participants<br>(n = 31) |
|------------------|------------------------------|------------------------------|
| $\omega_2$       | -1.402 (0.893)               | -1.371 (0.705)               |
| $\omega_3$       | 4.743 (0.337)                | 4.788 (0.297)                |
| $\sigma_2^{k=0}$ | 0.105 (0.007)                | 0.109 (0.007)                |
| $\sigma_3^{k=0}$ | 0.999 (0.003)                | 0.999 (0.002)                |

Summary of the hierarchical Gaussian filter parameters following model inversion for each group (means, and in parentheses standard deviation).
